# Supplementary material for: Effect of Dendritic Side Groups on the Mobility of Modified Poly(epichlorohydrin) Copolymers
Source: MDPI journal article supplement (doi:10.3390/polym13121961), 2021-06-13
Supplement: s1 [file s1]

## SUPPLEMENTARY MATERIALS

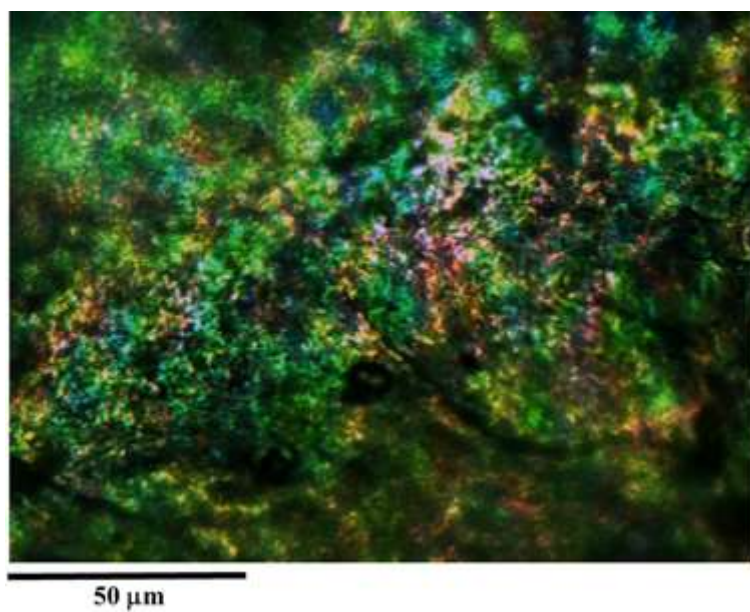

**Figure S1** Optical micrograph between crossed polars of PECH40, unoriented membrane after casting, room temperature.
